# Supplementary material for: Two-dimensional monolayer C5-10-16: a metallic carbon allotrope as an anode material for high-performance sodium/potassium-ion batteries
Source: Royal Society of Chemistry journal article supplement (doi:10.1039/d3cp05553a), 2024-01-01
Supplement: d3cp05553a1.pdf [file d3cp05553a1.pdf]

## Supporting Information

### **Two-dimensional monolayer C<sub>5-10-16</sub>: a metallic carbon allotrope as an anode material of high-performance sodium/potassium-ion batteries**

Wen-Chun Wang,<sup>a</sup> Ya-Qun Dai,<sup>a</sup> Tian-Le Zhao,<sup>a</sup> Xiao-Juan Ye,<sup>b,\*</sup> Xiao-Hong Zheng,<sup>c</sup>

Ran Jia,<sup>d</sup> Chun-Sheng Liu<sup>a,\*</sup>

<sup>a</sup>College of Electronic and Optical Engineering, Nanjing University of Posts and Telecommunications, Nanjing 210023, China

<sup>b</sup>College of Integrated Circuit Science and Engineering, Nanjing University of Posts and Telecommunications, Nanjing 210023, China

<sup>c</sup>College of Information Science and Technology, Nanjing Forestry University, Nanjing 210037, China

<sup>d</sup>Institute of Theoretical Chemistry, College of Chemistry, Jilin University, Changchun 130023, China

\*Email: yexj@njupt.edu.cn (X.-J.Y.).

\*Email: cslu@njupt.edu.cn (C.-S.L.).

## 1. Phonon spectra of $C_{5-10-16}$ monolayer

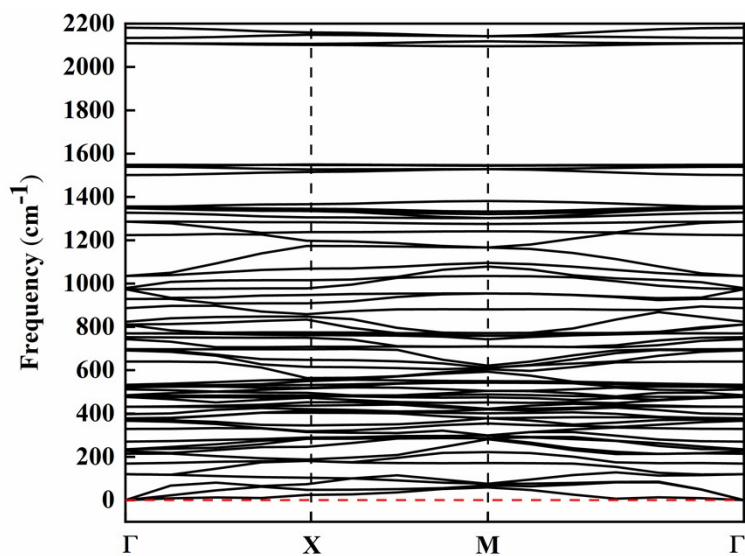

Fig. S1. Phonon spectra of  $C_{5-10-16}$  monolayer.

## 2. The 17 possible adsorption sites on monolayer $C_{5-10-16}$

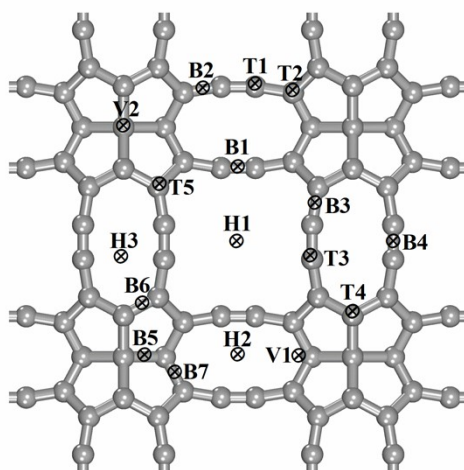

Fig. S2. 17 Possible adsorption sites.

### 3. Initial and final adsorption sites on monolayer C<sub>5-10-16</sub>

**Table S1** Initial and final adsorption sites on C<sub>5-10-16</sub>.

|                           | Initial site of Na(K) | Final site of Na(K) |
|---------------------------|-----------------------|---------------------|
|                           | H1                    | H1(H1)              |
|                           | H2                    | H2(H2)              |
|                           | V1                    | V1(H2)              |
|                           | H3                    | H3(H3)              |
|                           | V2                    | V2(V2)              |
|                           | B1                    | H2(H2)              |
|                           | T1                    | H2(H2)              |
|                           | B2                    | H2(H2)              |
| Possible adsorption sites | T2                    | V1(H2)              |
|                           | B7                    | V1(H2)              |
|                           | B3                    | H3(H3)              |
|                           | T3                    | H3(H3)              |
|                           | B4                    | H3(H3)              |
|                           | T5                    | H3(H3)              |
|                           | T4                    | V2(V2)              |
|                           | B5                    | V2(V2)              |
|                           | B6                    | V2(V2)              |

#### 4. The $E_{\text{diff-ads}}$ of Na and K atoms on the $C_{5-10-16}$ monolayer

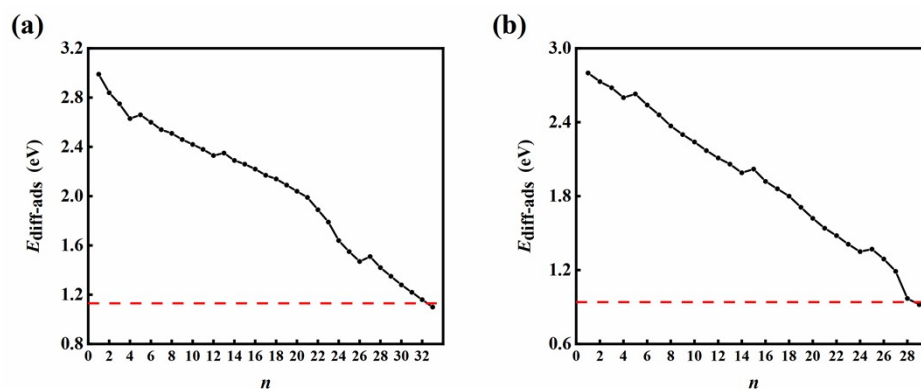

**Fig. S3.**  $E_{\text{diff-ads}}$  of (a) Na and (b) K atoms on the  $C_{5-10-16}$  monolayer. The red dashed line represents the cohesive energy of bulk Na/K (1.13 eV/0.94 eV).

#### 5. The average interlayer distance ( $D$ ) of $C_{5-10-16}$ bilayer with adsorbed Na

**Table S2** The average interlayer distance ( $D$ ) of  $C_{5-10-16}$  bilayer with adsorbed Na.

|                                              | site | $D$    |
|----------------------------------------------|------|--------|
| Outside surface of the $C_{5-10-16}$ bilayer | H1   | 3.45 Å |
|                                              | H2   | 3.53 Å |
|                                              | V1   | 3.54 Å |
|                                              | H3   | 3.52 Å |
|                                              | V2   | 3.55 Å |
| Interlayer of the $C_{5-10-16}$ bilayer      | H1   | 3.46 Å |
|                                              | H2   | 3.76 Å |
|                                              | H3   | 3.76 Å |

#### 6. The average interlayer distance ( $D$ ) of $C_{5-10-16}$ bilayer with adsorbed K

**Table S3** The average interlayer distance ( $D$ ) of  $C_{5-10-16}$  bilayer with adsorbed K.

|                                              | site | $D$    |
|----------------------------------------------|------|--------|
| Outside surface of the $C_{5-10-16}$ bilayer | H1   | 3.54 Å |
|                                              | H2   | 3.54 Å |
|                                              | H3   | 3.53 Å |
|                                              | V2   | 3.55 Å |
| Interlayer of the $C_{5-10-16}$ bilayer      | H2   | 4.09 Å |
|                                              | H3   | 4.09 Å |
|                                              | V2   | 4.15 Å |
